# Supplementary material
Source: publisher figshare collection journal article supplement (https://karger.figshare.com/articles/dataset/_/5125315)

# Supplementary Fig. A. Prevalence of detrusor overactivity in patients with multiple sclerosis (random-effect model). CI = confidence interval.

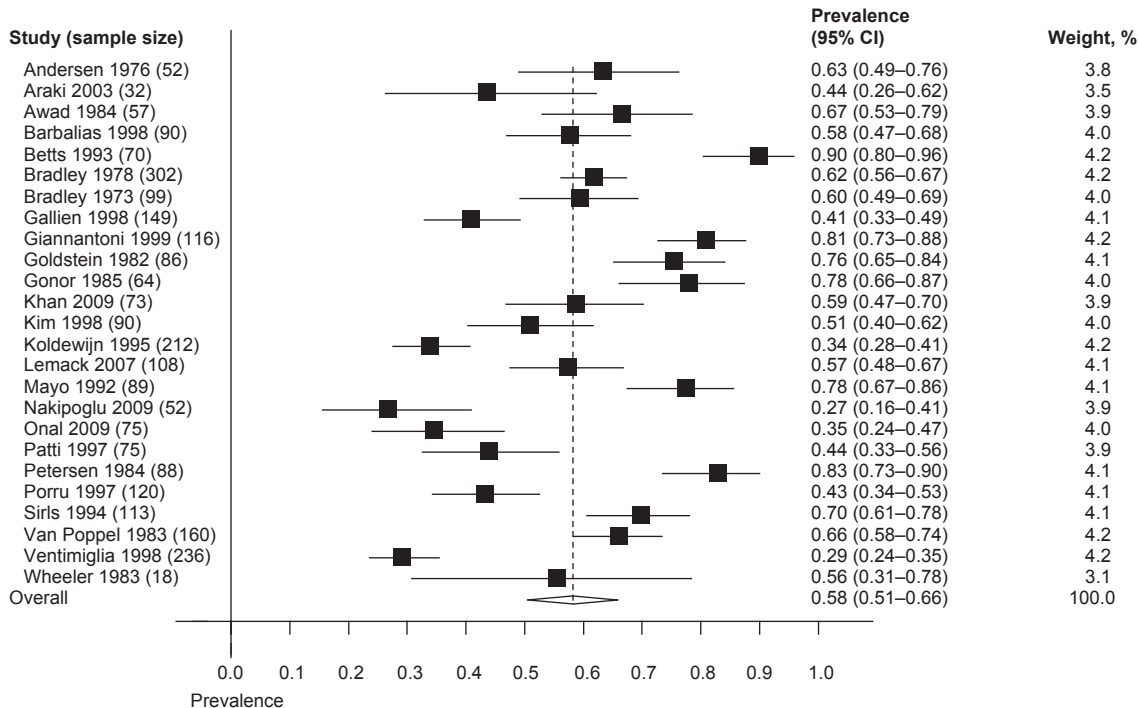

## Supplementary Fig. B. Prevalence of detrusor overactivity in patients with spinal cord injury (random-effect model). CI = confidence interval.

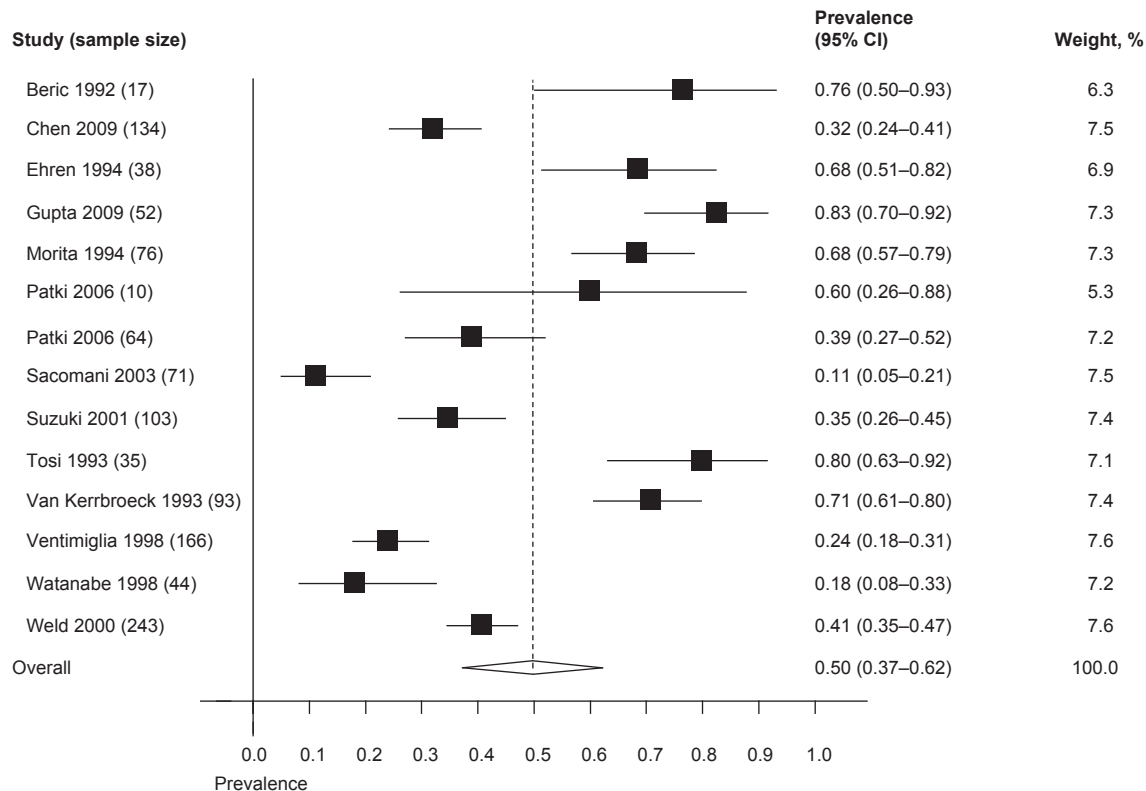

**Supplementary Fig. C.** Prevalence of detrusor overactivity in patients with Parkinson's disease (random-effect model). CI = confidence interval.

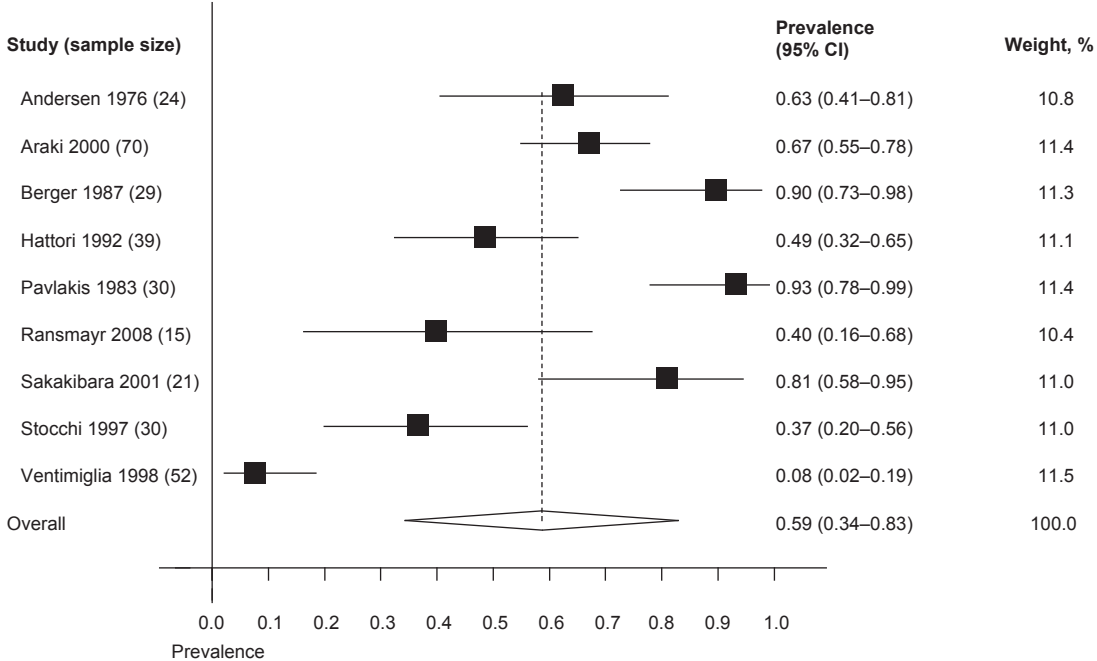

Supplement: Supplementary file 1 [file 1]
