# Supplementary material
Source: publisher figshare collection journal article supplement (https://karger.figshare.com/articles/dataset/_/5125315)
Supplement: Supplementary file 2 [file 1]

## References

1. Abrams P, Cardozo L, Fall M, Griffiths D, Rosier P, Ulmsten U, Van Kerrebroeck P, Victor A, Wein A. The standardisation of terminology in lower urinary tract function: report from the standardisation sub-committee of the International Continence Society. *Urology* 2003;61:37–49.
2. Karsenty G, Denys P, Amarenco G, De Seze M, Gamé X, Haab F, Kerdraon J, Perrouin-Verbe B, Ruffion A, Saussine C, Soler JM, Schurch B, Chartier-Kastler E. Botulinum toxin A (Botox) intradetrusor injections in adults with neurogenic detrusor overactivity/neurogenic overactive bladder: a systematic literature review. *Eur Urol* 2008;53:275–287.
3. Burns AS, Rivas DA, Ditunno JF. The management of neurogenic bladder and sexual dysfunction after spinal cord injury. *Spine (Phila Pa 1976)* 2001;26:S129–S136.
4. Gupta A, Taly AB, Srivastava A, Thyloth M. Urodynamics post stroke in patients with urinary incontinence: Is there correlation between bladder type and site of lesion? *Ann Indian Acad Neurol* 2009;12:104–107.
5. Nortvedt MW, Riise T, Myhr KM, Landt blom AM, Bakke A, Nyland HI. Reduced quality of life among multiple sclerosis patients with sexual disturbance and bladder dysfunction. *Mult Scler* 2001;7:231–235.
6. van Gool JD, Dik P, de Jong TP. Bladder-sphincter dysfunction in myelomeningocele. *Eur J Pediatr* 2001;160:414–420.
7. Winge K, Fowler CJ. Bladder dysfunction in Parkinsonism: mechanisms, prevalence, symptoms, and management. *Mov Disord* 2006;21:737–745.
8. Berger Y, Blaivas JG, DeLaRocha ER, Salinas JM. Urodynamic findings in Parkinson's disease. *J Urol* 1987;138:836–838.
9. Betts CD, D'Mellow MT, Fowler CJ. Urinary symptoms and the neurological features of bladder dysfunction in multiple sclerosis. *J Neurol Neurosurg Psychiatry* 1993;56:245–250.

10. Chancellor MB, Anderson RU, Boone TB. Pharmacotherapy for neurogenic detrusor overactivity. *Am J Phys Med Rehabil* 2006;85:536-545.
11. Rackley R, Vasavada SP, Firoozi F, Ingber MS. Neurogenic bladder. *eMedicine*. 2009. Available at: <http://emedicine.medscape.com/article/453539-overview#showall>. Updated November 23, 2011. Accessed September 13, 2012.
12. Kohli N, Patterson D. InterStim therapy: a contemporary approach to overactive bladder. *Rev Obstet Gynecol* 2009;2:18–27.
13. Centre for Reviews and Dissemination. Systematic reviews: CRD's guidance for undertaking reviews in health care. York, CRD, University of York, 2008. Available at: [http://www.york.ac.uk/inst/crd/pdf/Systematic\\_Reviews.pdf](http://www.york.ac.uk/inst/crd/pdf/Systematic_Reviews.pdf). Accessed September 13, 2012.
14. DerSimonian R, Laird N. Meta-analysis in clinical trials. *Control Clin Trials* 1986;7:177–188.
15. Cochran WG. The combination of estimates from different experiments. *Biometrics* 1954;10:101–129.
16. Higgins JP, Thompson SG. Quantifying heterogeneity in a meta-analysis. *Stat Med* 2002;21:1539–1558.
17. de Sèze M, Ruffion A, Denys P, Joseph PA, Perrouin-Verbe B, and the International Francophone Neuro-Urological expert study group (GENULF). The neurogenic bladder in multiple sclerosis: review of the literature and proposal of management guidelines. *Mult Scler* 2007;13:915–928.
18. Litwiller SE, Frohman EM, Zimmern PE. Multiple sclerosis and the urologist. *J Urol* 1999;161:743–757.
19. Bradley WE, Logothetis JL, Timm GW. Cystometric and sphincter abnormalities in multiple sclerosis. *Neurology* 1973;23:1131–1139.
20. Patti F, Ventimiglia B, Failla G, Genazzani AA, Reggio A. Micturition disorders in multiple sclerosis patients: neurological, neurourodynamic and magnetic resonance findings. *Eur J Neurol* 1997;4:259–265.

21. Araki I, Matsui M, Ozawa K, Takeda M, Kuno S. Relationship of bladder dysfunction to lesion site in multiple sclerosis. *J Urol* 2003;169:1384–1387.
22. Ventimiglia B, Patti F, Reggio E, Failla G, Morana C, Lopes M, Savoca F, Consoli C, Reggio A. Disorders of micturition in neurological patients. A clinical study of 786 patients. *J Neurol* 1998;245:173–177.
23. Sirls LT, Zimmern PE, Leach GE. Role of limited evaluation and aggressive medical management in multiple sclerosis: a review of 113 patients. *J Urol* 1994;151:946–950.
24. Neville C, Mallinson T, Almagor O, Fitzgerald C, Heinemann A. Impact of urinary incontinence on rehabilitation outcomes in inpatient rehabilitation facilities in the United States [abstract 130]. *Neurourol Urodyn* 2009;28:737–739.
25. Blanes L, Lourenço L, Carmagnani MI, Ferreira LM. Clinical and socio-demographic characteristics of persons with traumatic paraplegia living in Sao Paulo, Brazil. *Arq Neuropsiquiatr* 2009;67:388–390.
26. McDonald AC, Nicoll JA, Rampling RP. Non-Hodgkin's lymphoma presenting with spinal cord compression; a clinicopathological review of 25 cases. *Eur J Cancer* 2000;36:207–213.
27. Kahloon AA, Arif H, Baig SM, Khawaja MR. Characteristics of acute transverse myelitis at Aga Khan University Hospital, Karachi. *J Pak Med Assoc* 2007;57:215–218.
28. Sacomani CA, Trigo-Rocha FE, Gomes CM, Greve JA, Barros TE, Arap S. Effect of the trauma mechanism on the bladder-sphincteric behavior after spinal cord injury. *Spinal Cord* 2003;41:12–15.
29. Khanna R, Sandhu AS, Doddamani D. Urodynamic management of neurogenic bladder in spinal cord injury. *Med J Armed Forces India* 2009;65:300–304.
30. Araki I, Kuno S. Assessment of voiding dysfunction in Parkinson's disease by the international prostate symptom score. *J Neurol Neurosurg Psychiatry* 2000;68:429–433.

31. Khan Z, Starer P, Bhola A. Urinary incontinence in female Parkinson disease patients. Pitfalls of diagnosis. *Urology* 1989;33:486–489.
32. Pavlakis AJ, Siroky MB, Goldstein I, Krane RJ. Neurourologic findings in Parkinson's disease. *J Urol* 1983;129:80–83.
33. Brocklehurst JC, Andrews K, Richards B, Laycock PJ. Incidence and correlates of incontinence in stroke patients. *J Am Geriatr Soc* 1985;33:540–542.
34. Tibaek S, Gard G, Klarskov P, Iversen HK, Dehlendorff C, Jensen R. Are activity limitations associated with lower urinary tract symptoms in stroke patients? A cross-sectional, clinical survey. *Scand J Urol Nephrol* 2009;43:383–389.
35. Ersoz M, Tunc H, Akyuz M, Ozel S. Bladder storage and emptying disorder frequencies in hemorrhagic and ischemic stroke patients with bladder dysfunction. *Cerebrovasc Dis* 2005;20:395–399.
36. Silveri M, Capitanucci ML, Capozza N, Mosiello G, Silvano A, Gennaro MD. Occult spinal dysraphism: neurogenic voiding dysfunction and long-term urologic follow-up. *Pediatr Surg Int* 1997;12:148–150.
37. Chang CK, Wong TT, Huang BS, Chan RC, Yang TF. Spinal dysraphism: a cross-sectional and retrospective multidisciplinary clinic-based study. *J Chin Med Assoc* 2008;71:502–508.
38. Torre M, Buffa P, Jasonni V, Cama A. Long-term urologic outcome in patients with caudal regression syndrome, compared with meningomyelocele and spinal cord lipoma. *J Pediatr Surg* 2008;43:530–533.
39. Pérez LM, Wilbanks JT, Joseph DB, Oakes WJ. Urological outcome of patients with cervical and upper thoracic myelomeningocele. *J Urol* 2000;164:962–964.
40. van Gool JD, Kuijten RH, Donckerwolcke RA, Kramer PP. Detrusor-sphincter dyssynergia in children with myelomeningocele: a prospective study. *Z Kinderchir* 1982;37:148–152.
41. Abrams P, Cardozo L, Fall M, Griffiths D, Rosier P, Ulmsten U, van Kerrebroeck P, Victor A, Wein A. The standardisation of terminology of lower urinary tract function:

- report from the standardisation sub-committee of the International Continence Society. *Neurourol Urodyn* 2002;21:167–178.
42. Mahajan ST, Patel PB, Marrie RA. Under treatment of overactive bladder symptoms in patients with multiple sclerosis: an ancillary analysis of the NARCOMS Patient Registry. *J Urol* 2010;183:1432–1437.
  43. Marrie RA, Cutter G, Tyry T, Vollmer T, Campagnolo D. Disparities in the management of multiple sclerosis-related bladder symptoms. *Neurology* 2007;68:1971–1978.
  44. Weld KJ, Dmochowski RR. Association of level of injury and bladder behavior in patients with post-traumatic spinal cord injury. *Urology* 2000;55:490–494.
  45. Ellsworth PI CP, Esquenazi A, Andersson K-E, Burks JS, Halper J, Nitti VW, Sheremata WA, Staskin DR, Tobin PJ, Wein AJ. Consensus Statement on Neurogenic Detrusor Overactivity: Multiple Sclerosis and Spinal Cord Injury. *UroToday Int J* 2012;Mar;5(suppl 1):art 96. <http://dx.doi.org/10.3834/uij.1944-5784.2012.03.01>.
  46. Campos-Sousa RN, Quagliato E, da Silva BB, de Carvalho RM, Jr., Ribeiro SC, de Carvalho DF. Urinary symptoms in Parkinson's disease: prevalence and associated factors. *Arq Neuropsiquiatr* 2003;61:359–363.
  47. Coelho M, Marti MJ, Tolosa E, Ferreira JJ, Valldeoriola F, Rosa M, Sampaio C. Late-stage Parkinson's disease: the Barcelona and Lisbon cohort. *J Neurol* 2010;257:1524–1532.
  48. Kirshblum S, Millis S, McKinley W, Tulskey D. Late neurologic recovery after traumatic spinal cord injury. *Arch Phys Med Rehabil* 2004;85:1811-1817.
  49. Brittain KR, Perry SI, Peet SM, Shaw C, Dallosso H, Assassa RP, Williams K, Jagger C, Potter JF, Castleden CM. Prevalence and impact of urinary symptoms among community-dwelling stroke survivors. *Stroke* 2000;31:886–891.

50. Edwards DF, Hahn M, Dromerick A. Post stroke urinary loss, incontinence and life satisfaction: when does post-stroke urinary loss become incontinence? *Neurourol Urodyn* 2006;25:39–45.
51. Jørgensen L, Engstad T, Jacobsen BK. Self-reported urinary incontinence in noninstitutionalized long-term stroke survivors: A population-based study. *Arch Phys Med Rehabil* 2005;86:416–420.
52. Nakayama H, Jørgensen HS, Pedersen PM, Raaschou HO, Olsen TS. Prevalence and risk factors of incontinence after stroke. The Copenhagen Stroke Study. *Stroke* 1997;28:58–62.
53. Manack A, Motsko SP, Haag-Molkenteller C, Dmochowski RR, Goehring EL, Jr., Nguyen-Khoa BA, Jones JK. Epidemiology and healthcare utilization of neurogenic bladder patients in a US claims database. *Neurourol Urodyn* 2011;30:395-401.
54. Barbalias GA, Nikiforidis G, Liatsikos EN. Vesicourethral dysfunction associated with multiple sclerosis: clinical and urodynamic perspectives. *J Urol* 1998;160:106-111.
55. Gallien P, Robineau S, Nicolas B, Le Bot MP, Brissot R, Verin M. Vesicourethral dysfunction and urodynamic findings in multiple sclerosis: a study of 149 cases. *Arch Phys Med Rehabil* 1998;79:255-257.
56. Goldstein I, Siroky MB, Sax DS, Krane RJ. Neurourologic abnormalities in multiple sclerosis. *J Urol* 1982;128:541-545.
57. Gonor SE, Carroll DJ, Metcalfe JB. Vesical dysfunction in multiple sclerosis. *Urology* 1985;25:429-431.
58. Hennessey A, Robertson NP, Swingler R, Compston DA. Urinary, faecal and sexual dysfunction in patients with multiple sclerosis. *J Neurol* 1999;246:1027-1032.
59. Koldewijn EL, Hommes OR, Lemmens WA, Debruyne FM, van Kerrebroeck PE. Relationship between lower urinary tract abnormalities and disease-related parameters in multiple sclerosis. *J Urol* 1995;154:169-173.

60. Nair KP, Taly AB, Maheshwarappa BM, Kumar J, Murali T, Rao S. Nontraumatic spinal cord lesions: a prospective study of medical complications during in-patient rehabilitation. *Spinal Cord* 2005;43:558-564.
61. Onal B, Siva A, Buldu I, Demirkesen O, Cetinel B. Voiding dysfunction due to multiple sclerosis: a large scale retrospective analysis. *Int Braz J Urol* 2009;35:326-333.
62. Porru D, Campus G, Garau A, Sorgia M, Pau AC, Spinici G, Pischedda MP, Marrosu MG, Scarpa RM, Usai E. Urinary tract dysfunction in multiple sclerosis: is there a relation with disease-related parameters? *Spinal Cord* 1997;35:33-36.
63. Thomas TM GM, George M, Parikshak N, Meade TW. The prevalence of urinary symptoms in patients with chronic neurological disease. *Community Medicine* 1998;Vol. 10:124-129.
64. Gomes CM, Hisano M, Machado LR, Figueiredo JA, Lucon AM, Trigo-Rocha FE. Urological manifestations of chronic schistosomal myeloradiculopathy. *BJU Int* 2005;96:853-856.
65. Hansen RB, Biering-Sorensen F, Kristensen JK. Urinary incontinence in spinal cord injured individuals 10-45 years after injury. *Spinal Cord* 2010;48:27-33.
66. Vogel LC, Krajci KA, Anderson CJ. Adults with pediatric-onset spinal cord injury: part 1: prevalence of medical complications. *J Spinal Cord Med* 2002;25:106-116.
67. Hattori T, Yasuda K, Kita K, Hirayama K. Voiding dysfunction in Parkinson's disease. *Jpn J Psychiatry Neurol* 1992;46:181-186.
68. Hely MA, Morris JG, Reid WG, Trafficante R. Sydney Multicenter Study of Parkinson's disease: non-L-dopa-responsive problems dominate at 15 years. *Mov Disord* 2005;20:190-199.
69. Hely MA, Reid WG, Adena MA, Halliday GM, Morris JG. The Sydney multicenter study of Parkinson's disease: the inevitability of dementia at 20 years. *Mov Disord* 2008;23:837-844.
70. Pohar SL, Allyson Jones C. The burden of Parkinson disease (PD) and concomitant comorbidities. *Arch Gerontol Geriatr* 2009;49:317-321.

71. Singer C, Weiner WJ, Sanchez-Ramos JR. Autonomic dysfunction in men with Parkinson's disease. *Eur Neurol* 1992;32:134-140.
72. Verbaan D, Marinus J, Visser M, van Rooden SM, Stiggelbout AM, van Hilten JJ. Patient-reported autonomic symptoms in Parkinson disease. *Neurology* 2007;69:333-341.
73. Wullner U, Schmitz-Hubsch T, Antony G, Fimmers R, Spottke A, Oertel WH, Deuschl G, Klockgether T, Eggert K. Autonomic dysfunction in 3414 Parkinson's disease patients enrolled in the German Network on Parkinson's disease (KNP e.V.): the effect of ageing. *Eur J Neurol* 2007;14:1405-1408.
74. Addington-Hall J, Lay M, Altmann D, McCarthy M. Symptom control, communication with health professionals, and hospital care of stroke patients in the last year of life as reported by surviving family, friends, and officials. *Stroke* 1995;26:2242-2248.
75. Barer DH. Continence after stroke: useful predictor or goal of therapy? *Age Ageing* 1989;18:183-191.
76. Brittain K, Perry S, Shaw C, Matthews R, Jagger C, Potter J. Isolated urinary, fecal, and double incontinence: Prevalence and degree of soiling in stroke survivors. *J Am Geriatr Soc* 2006;54:1915-1919.
77. Feder M RH, Motin M. Bladder control in first stroke patients after in-patient rehabilitation - relationship to age, right hemisphere damage, functional profile and neglect syndrome. *Eur J Med Rehabili* 1996;6: 106-109.
78. Kolominsky-Rabas PL, Hilz MJ, Neundoerfer B, Heuschmann PU. Impact of urinary incontinence after stroke: results from a prospective population-based stroke register. *Neurourol Urodyn* 2003;22:322-327.
79. Motola J, Mascarenas B, Badlani G. Cerebrovascular accidents: urodynamic and neuroanatomic findings. *J Urol* 1988;139:512A.
80. Patel M, Coshall C, Rudd AG, Wolfe CD. Natural history and effects on 2-year outcomes of urinary incontinence after stroke. *Stroke* 2001;32:122-127.



81. Patel MD, McKevitt C, Lawrence E, Rudd AG, Wolfe CD. Clinical determinants of long-term quality of life after stroke. *Age Ageing* 2007;36:316-322.
82. van de Port IG, Kwakkel G, Schepers VP, Lindeman E. Predicting mobility outcome one year after stroke: a prospective cohort study. *J Rehabil Med* 2006;38:218-223.
83. Forbes A, While A, Mathes L, Griffiths P. Health problems and health-related quality of life in people with multiple sclerosis. *Clin Rehabil* 2006;20:67-78.
84. Pohar SL, Jones CA, Warren S, Turpin KV, Warren K. Health status and health care utilization of multiple sclerosis in Canada. *Can J Neurol Sci* 2007;34:167-174.
85. Andersen JT, Bradley WE. Abnormalities of detrusor and sphincter function in multiple sclerosis. *Br J Urol* 1976;48:193-198.
86. Awad SA, Gajewski JB, Sogbein SK, Murray TJ, Field CA. Relationship between neurological and urological status in patients with multiple sclerosis. *J Urol* 1984;132:499-502.
87. Bradley WE. Urinary bladder dysfunction in multiple sclerosis. *Neurology* 1978;28:52-58.
88. Giannantoni A, Scivoletto G, Di Stasi SM, Grasso MG, Finazzi Agro E, Collura G, Vespasiani G. Lower urinary tract dysfunction and disability status in patients with multiple sclerosis. *Arch Phys Med Rehabil* 1999;80:437-441.
89. Khan F, Pallant JF, Shea TL, Whishaw M. Multiple sclerosis: prevalence and factors impacting bladder and bowel function in an Australian community cohort. *Disabil Rehabil* 2009;31:1567-1576.
90. Kim YH, Goodman C, Omessi E, Rivera V, Kattan MW, Boone TB. The correlation of urodynamic findings with cranial magnetic resonance imaging findings in multiple sclerosis. *J Urol* 1998;159:972-976.
91. Lemack GE, Frohman E, Ramnarayan P. Women with voiding dysfunction secondary to bladder outlet dyssynergia in the setting of multiple sclerosis do not demonstrate significantly elevated intravesical pressures. *Urology* 2007;69:893-897.

92. Mayo ME, Chetner MP. Lower urinary tract dysfunction in multiple sclerosis. *Urology* 1992;39:67-70.
93. Nakipoglu GF, Kaya AZ, Orhan G, Tezen O, Tunc H, Ozgirgin N, Ak F. Urinary dysfunction in multiple sclerosis. *J Clin Neurosci* 2009;16:1321-1324.
94. Petersen T, Pedersen E. Neurourodynamic evaluation of voiding dysfunction in multiple sclerosis. *Acta Neurol Scand* 1984;69:402-411.
95. Van Poppel H, Vereecken RL, Leruitte A. Neuro-muscular dysfunction of the lower urinary tract in multiple sclerosis. *Paraplegia* 1983;21:374-379.
96. Wheeler JS, Jr., Siroky MB, Pavlakis AJ, Goldstein I, Krane RJ. The changing neurourologic pattern of multiple sclerosis. *J Urol* 1983;130:1123-1126.
97. Beric A, Light JK. Function of the conus medullaris and cauda equina in the early period following spinal cord injury and the relationship to recovery of detrusor function. *J Urol* 1992;148:1845-1848.
98. Chen Z, Sun S, Deng R, Cai D, Yuan X, Du G, Yang W, Ye Z. The assessment of bladder and urethral function in spinal cord injury patients. *J Huazhong Univ Sci Technolog Med Sci* 2009;29:609-613.
99. Ehren I AP, Kinn AC. Renal and bladder functions in patients after spinal cord injuries. *Scand J Urol Nephrol* 1994;28:127-133.
100. Morita H, Sazawa A, Kanno T, Koyanagi T. Long term urinary prognosis of cervical cord injury patients. *Paraplegia* 1994;32:30-35.
101. Patki P, Hamid R, Somayaji S, Bycroft J, Shah PJ, Craggs M. Long-term urological outcomes in paediatric spinal cord injury. *Spinal Cord* 2006;44:729-733.
102. Patki P, Woodhouse J, Hamid R, Shah J, Craggs M. Lower urinary tract dysfunction in ambulatory patients with incomplete spinal cord injury. *J Urol* 2006;175:1784-1787; discussion 1787.
103. Suzuki T, Ushiyama T. Vesicoureteral reflux in the early stage of spinal cord injury: a retrospective study. *Spinal Cord* 2001;39:23-25.

104. Tosi L, Righetti C, Terrini G, Zanette G. Atypical syndromes caudal to the injury site in patients following spinal cord injury. A clinical, neurophysiological and MRI study. *Paraplegia* 1993;31:751-756.
105. Van Kerrebroeck PE, Koldewijn EL, Scherpenhuizen S, Debruyne FM. The morbidity due to lower urinary tract function in spinal cord injury patients. *Paraplegia* 1993;31:320-329.
106. Watanabe T, Vaccaro AR, Kumon H, Welch WC, Rivas DA, Chancellor MB. High incidence of occult neurogenic bladder dysfunction in neurologically intact patients with thoracolumbar spinal injuries. *J Urol* 1998;159:965-968.
107. Araki I, Kitahara M, Oida T, Kuno S. Voiding dysfunction and Parkinson's disease: urodynamic abnormalities and urinary symptoms. *J Urol* 2000;164:1640-1643.
108. Ransmayr GN, Holliger S, Schletterer K, Heidler H, Deibl M, Poewe W, Madersbacher H, Kiss G. Lower urinary tract symptoms in dementia with Lewy bodies, Parkinson disease, and Alzheimer disease. *Neurology* 2008;70:299-303.
109. Sakakibara R, Shinotoh H, Uchiyama T, Sakuma M, Kashiwado M, Yoshiyama M, Hattori T. Questionnaire-based assessment of pelvic organ dysfunction in Parkinson's disease. *Auton Neurosci* 2001;92:76-85.
110. Stocchi F, Carbone A, Inghilleri M, Monge A, Ruggieri S, Berardelli A, Manfredi M. Urodynamic and neurophysiological evaluation in Parkinson's disease and multiple system atrophy. *J Neurol Neurosurg Psychiatry* 1997;62:507-511.
111. Han KS, Heo SH, Lee SJ, Jeon SH, Yoo KH. Comparison of urodynamics between ischemic and hemorrhagic stroke patients; can we suggest the category of urinary dysfunction in patients with cerebrovascular accident according to type of stroke? *Neurourol Urodyn* 2010;29:387-390.
112. Khan Z, Starer P, Yang WC, Bhola A. Analysis of voiding disorders in patients with cerebrovascular accidents. *Urology* 1990;35:265-270.

113. Kim TG, Yoo KH, Jeon SH, Lee HL, Chang SG. Effect of dominant hemispheric stroke on detrusor function in patients with lower urinary tract symptoms. *Int J Urol* 2010;17:656-660.
114. Motola JA, Badlani GH. Cerebrovascular accidents. Urological effects and management. *Clin Geriatr Med* 1990;6:55-68.
115. Nitti VW, Adler H, Combs AJ. The role of urodynamics in the evaluation of voiding dysfunction in men after cerebrovascular accident. *J Urol* 1996;155:263-266.
116. Tsuchida S, Noto H, Yamaguchi O, Itoh M. Urodynamic studies on hemiplegic patients after cerebrovascular accident. *Urology* 1983;21:315-318.
117. Motola J MB, Badlani G. Cerebrovascular accidents: urodynamic and neuroanatomical findings. *J Urol* 1988;139.
118. Sacomani CA, Trigo-Rocha FE, Gomes CM, Greve JA, Barros TE, Arap S. Effect of the trauma mechanism on the bladder-sphincteric behavior after spinal cord injury. *Spinal Cord* 2003;41:12-15.
