# Supplementary material
Source: publisher figshare collection journal article supplement (https://karger.figshare.com/articles/dataset/_/5125315)
Supplement: Supplementary file 3 [file 1]

Archive with 3 entries (3 files):
- 000353274_sm_Figures.pdf
- 000353274_sm_References.pdf
- 000353274_sm_Tables.pdf
