# Supplementary material
Source: publisher figshare collection journal article supplement (https://karger.figshare.com/articles/dataset/_/5125315)
Supplement: Supplementary file 3 [file 1 › 000353274_sm_Tables.pdf]

## Appendix

**Supplementary Table A.** Alternative terms for neurogenic overactive bladder considered in the literature searches

- Bladder dysfunction
- Bladder problems
- Bladder symptoms
- Detrusor areflexia
- Detrusor disorder
- Detrusor hyperreflexia ( $\pm$  impaired contractility)
- Detrusor motor overactivity ( $\pm$  external detrusor–sphincter dyssynergia)
- Detrusor overactivity
- Frequency
- Genitourinary complications
- Incontinence
- Loss of bladder control
- Neurogenic bladder
- Neurogenic bladder disease
- Neurogenic bladder dysfunction
- Neurogenic detrusor overactivity
- Neurogenic lower urinary tract dysfunction
- Neurogenic vesicourethral dysfunction
- Overactive bladder
- Overactive bladder symptoms of neurogenic origin
- Overactive bladder with neurological condition
- Urge frequency syndrome
- Urinary incontinence with neurological condition
- Urge syndrome
- Urgency
- Urodynamic abnormalities
- Voiding dysfunction

**Supplementary Table B.** Covariates used in stratified analysis

| Covariate                     | Subgroup              |
|-------------------------------|-----------------------|
| Year of publication           | Before 2000           |
|                               | 2000 onwards          |
| Geographical location         | Europe                |
|                               | North America         |
|                               | Rest of the world     |
| Sample size                   | Large ( $\geq 250$ )  |
|                               | Medium (100–249)      |
|                               | Small ( $< 100$ )     |
| Sample size regrouped         | Larger ( $\geq 100$ ) |
|                               | Smaller ( $< 100$ )   |
| Type of assessment            | Clinical              |
|                               | Questionnaire         |
|                               | Records               |
| Urinary symptoms at inclusion | No                    |
|                               | Yes                   |
| Type of study                 | Case-control study    |
|                               | Case series           |
|                               | Cohort study          |
|                               | Cross-sectional study |

**Supplementary Table C.** Details of final selection of articles reporting rates of UI

| Study                                      | Location    | Study type      | Assessment type | Urinary symptoms at inclusion | Patients assessed | Patients with UI | Rate  | 95% CI <sup>1</sup> |
|--------------------------------------------|-------------|-----------------|-----------------|-------------------------------|-------------------|------------------|-------|---------------------|
| <b>Multiple sclerosis</b>                  |             |                 |                 |                               |                   |                  |       |                     |
| Barbalias et al. 1998 <a href="#">[54]</a> | Greece      | Cross-sectional | Clinical        | No                            | 90                | 37               | 41.1% | 30.8–52.0%          |
| Bradley et al. 1973 <a href="#">[19]</a>   | USA         | Cross-sectional | Clinical        | Yes                           | 99                | 60               | 60.6% | 50.3–70.3%          |
| Forbes et al. 2006 <a href="#">[83]</a>    | UK          | Cross-sectional | Questionnaire   | No                            | 905               | 686              | 75.8% | 72.9–78.6%          |
| Gallien et al. 1998 <a href="#">[55]</a>   | France      | Cross-sectional | Records         | Yes                           | 149               | 103              | 69.1% | 61.0–76.4%          |
| Goldstein et al. 1982 <a href="#">[56]</a> | USA         | Cross-sectional | Clinical        | Yes                           | 86                | 41               | 47.7% | 36.8–58.7%          |
| Gonor et al. 1985 <a href="#">[57]</a>     | Canada      | Cross-sectional | Clinical        | Yes                           | 64                | 36               | 56.3% | 43.3–68.6%          |
| Hennessey et al. 1999 <a href="#">[58]</a> | UK          | Cross-sectional | Questionnaire   | No                            | 191               | 110              | 57.6% | 50.2–64.7%          |
| Koldewijn et al. 1995 <a href="#">[59]</a> | Netherlands | Cross-sectional | Clinical        | No                            | 212               | 55               | 25.9% | 20.2–32.4%          |
| Nair et al. 2005 <a href="#">[60]</a>      | India       | Cohort study    | Clinical        | No                            | 13                | 8                | 61.5% | 31.6–86.1%          |

|                                          |           |                    |               |     |     |     |       |            |
|------------------------------------------|-----------|--------------------|---------------|-----|-----|-----|-------|------------|
| Onal et al. 2009 <a href="#">[61]</a>    | Turkey    | Case series        | Records       | No  | 198 | 160 | 80.8% | 74.6–86.0% |
| Patti et al. 1997 <a href="#">[20]</a>   | Italy     | Cross-sectional    | Clinical      | No  | 101 | 7   | 6.9%  | 2.8–13.8%  |
| Pohar et al. 2007 <a href="#">[84]</a>   | Canada    | Case-control study | Questionnaire | No  | 335 | 96  | 28.7% | 23.9–33.8% |
| Porru et al. 1997 <a href="#">[62]</a>   | Italy     | Cross-sectional    | Clinical      | No  | 120 | 59  | 49.2% | 39.9–58.4% |
| Thomas et al. 1998 <a href="#">[63]</a>  | UK        | Cross-sectional    | Questionnaire | No  | 142 | 76  | 53.5% | 45.0–61.9% |
| <b>Spinal cord injury</b>                |           |                    |               |     |     |     |       |            |
| Blanes et al. 2009 <a href="#">[25]</a>  | Brazil    | Cross-sectional    | Questionnaire | No  | 60  | 53  | 88.3% | 77.4–95.2% |
| Gomes et al. 2005 <a href="#">[64]</a>   | Brazil    | Case series        | Questionnaire | Yes | 26  | 14  | 53.8% | 33.4–73.4% |
| Hansen et al. 2010 <a href="#">[65]</a>  | Denmark   | Cohort study       | Questionnaire | No  | 221 | 95  | 43.0% | 36.4–49.8% |
| Vogel et al. 2002 <a href="#">[66]</a>   | USA       | Cohort study       | Questionnaire | No  | 212 | 52  | 24.5% | 18.9–30.9% |
| <b>Parkinson's disease</b>               |           |                    |               |     |     |     |       |            |
| Hattori et al. 1992 <a href="#">[67]</a> | Japan     | Cross-sectional    | Clinical      | No  | 110 | 31  | 28.2% | 20.0–37.6% |
| Hely et al. 2005 <a href="#">[68]</a>    | Australia | Cohort study       | Clinical      | No  | 52  | 22  | 42.3% | 28.7–56.8% |

|                                                 |             |                    |               |    |      |     |       |            |
|-------------------------------------------------|-------------|--------------------|---------------|----|------|-----|-------|------------|
| Hely et al. 2008 <a href="#">[69]</a>           | Australia   | Cohort study       | Clinical      | No | 30   | 22  | 73.3% | 54.1–87.7% |
| Pohar et al. 2009 <a href="#">[70]</a>          | Canada      | Case-control study | Questionnaire | No | 261  | 29  | 11.1% | 7.6–15.6%  |
| Singer et al. 1992 <a href="#">[71]</a>         | USA         | Case-control study | Questionnaire | No | 48   | 6   | 12.5% | 4.7–25.2%  |
| Verbaan et al. 2007 <a href="#">[72]</a>        | Netherlands | Case-control study | Questionnaire | No | 420  | 214 | 51.0% | 46.1–55.8% |
| Wullner et al. 2007 <a href="#">[73]</a>        | Germany     | Cross-sectional    | Records       | No | 3214 | 707 | 22.0% | 20.6–23.5% |
| <b>Stroke</b>                                   |             |                    |               |    |      |     |       |            |
| Addington-Hall et al. 1995 <a href="#">[74]</a> | UK          | Case series        | Questionnaire | No | 237  | 121 | 51.1% | 44.5–57.6% |
| Barer 1989 <a href="#">[75]</a>                 | UK          | Cohort study       | Records       | No | 259  | 36  | 13.9% | 9.9–18.7%  |
| Brittain et al. 2000 <a href="#">[49]</a>       | UK          | Case-control study | Questionnaire | No | 382  | 127 | 33.2% | 28.5–38.2% |
| Brittain et al. 2006 <a href="#">[76]</a>       | UK          | Case-control study | Questionnaire | No | 1342 | 339 | 25.3% | 23.0–27.7% |

|                                                   |             |                    |               |    |     |     |       |            |
|---------------------------------------------------|-------------|--------------------|---------------|----|-----|-----|-------|------------|
| Brocklehurst et al. 1985 <a href="#">[33]</a>     | UK          | Cohort study       | Clinical      | No | 28  | 4   | 14.3% | 4.0–32.7%  |
| Edwards et al. 2006 <a href="#">[50]</a>          | USA         | Case series        | Questionnaire | No | 361 | 59  | 16.3% | 12.7–20.6% |
| Feder et al. 1996 <a href="#">[77]</a>            | Israel      | Cohort study       | Clinical      | No | 88  | 14  | 15.9% | 9.0–25.2%  |
| Jørgensen et al. 2005 <a href="#">[51]</a>        | Norway      | Case-control study | Questionnaire | No | 213 | 36  | 16.9% | 12.1–22.6% |
| Kolominsky-Rabas et al. 2003 <a href="#">[78]</a> | Germany     | Cohort study       | Questionnaire | No | 407 | 130 | 31.9% | 27.4–36.7% |
| Motola et al. 1988 <a href="#">[79]</a>           | USA         | Cross-sectional    | Clinical      | No | 30  | 15  | 50.0% | 31.3–68.7% |
| Nakayama et al. 1997 <a href="#">[52]</a>         | Denmark     | Cohort study       | Questionnaire | No | 493 | 94  | 19.1% | 15.7–22.8% |
| Patel et al. 2007 <a href="#">[81]</a>            | UK          | Cohort study       | Questionnaire | No | 150 | 23  | 15.3% | 10.0–22.1% |
| Patel et al. 2001 <a href="#">[80]</a>            | UK          | Cohort study       | Questionnaire | No | 123 | 12  | 9.8%  | 5.1–16.4%  |
| Van de Port et al. 2006 <a href="#">[82]</a>      | Netherlands | Cohort study       | Questionnaire | No | 217 | 61  | 28.1% | 22.2–34.6% |

UI = urinary incontinence; CI = confidence interval. <sup>1</sup> The CIs were calculated independently for this review and were not reported in the original articles cited.

**Supplementary Table D.** Details of final selection of articles reporting rates of DO

| Study                                          | Location | Study type      | Assessment type | Urinary symptoms at inclusion | Patients assessed | Patients with DO | Rate  | 95% CI     |
|------------------------------------------------|----------|-----------------|-----------------|-------------------------------|-------------------|------------------|-------|------------|
|                                                |          |                 |                 |                               |                   |                  |       |            |
| Andersen and Bradley 1976 <a href="#">[83]</a> | USA      | Cross-sectional | Clinical        | No                            | 52                | 33               | 63.5% | 49.0–76.4% |
| Araki et al. 2003 <a href="#">[21]</a>         | Japan    | Cross-sectional | Clinical        | No                            | 32                | 14               | 43.8% | 26.4–62.3% |
| Awad et al. 1984 <a href="#">[84]</a>          | Canada   | Cross-sectional | Clinical        | No                            | 57                | 38               | 66.7% | 52.9–78.6% |
| Barbalias et al. 1998 <a href="#">[54]</a>     | Greece   | Cross-sectional | Clinical        | No                            | 90                | 52               | 57.8% | 46.9–68.1% |
| Betts et al. 1993 <a href="#">[9]</a>          | UK       | Cross-sectional | Clinical        | Yes                           | 70                | 63               | 90.0% | 80.5–95.9% |
| Bradley et al. 1973 <a href="#">[19]</a>       | USA      | Cross-sectional | Clinical        | Yes                           | 99                | 59               | 59.6% | 49.3–69.3% |
| Bradley 1978 <a href="#">[85]</a>              | USA      | Cross-sectional | Clinical        | No                            | 302               | 187              | 61.9% | 56.2–67.4% |
| Gallien et al. 1998 <a href="#">[55]</a>       | France   | Cross-sectional | Clinical        | Yes                           | 149               | 61               | 40.9% | 33.0–49.3% |
| Giannantoni et al. 1999 <a href="#">[86]</a>   | Italy    | Cross-sectional | Clinical        | Yes                           | 116               | 94               | 81.0% | 72.7–87.7% |
| Goldstein et al. 1982                          | USA      | Cross-sectional | Clinical        | Yes                           | 86                | 65               | 75.6% | 65.1–84.2% |

|                                                 |             |                 |          |     |     |     |       |            |
|-------------------------------------------------|-------------|-----------------|----------|-----|-----|-----|-------|------------|
| <a href="#">[56]</a>                            |             |                 |          |     |     |     |       |            |
| Gonor et al. 1985 <a href="#">[57]</a>          | Canada      | Cross-sectional | Clinical | Yes | 64  | 50  | 78.1% | 66.0–87.5% |
| Khan et al. 2009 <a href="#">[87]</a>           | Australia   | Cross-sectional | Records  | No  | 73  | 43  | 58.9% | 46.8–70.3% |
| Kim et al. 1998 <a href="#">[88]</a>            | USA         | Case series     | Clinical | Yes | 90  | 46  | 51.1% | 40.3–61.8% |
| Koldewijn et al. 1995 <a href="#">[59]</a>      | Netherlands | Cross-sectional | Clinical | No  | 212 | 72  | 34.0% | 27.6–40.8% |
| Lemack et al. 2007 <a href="#">[89]</a>         | USA         | Cross-sectional | Clinical | Yes | 108 | 62  | 57.4% | 47.5–66.9% |
| Mayo and Chetner 1992 <a href="#">[90]</a>      | USA         | Cross-sectional | Clinical | Yes | 89  | 69  | 77.5% | 67.4–85.7% |
| Nakipoglu et al. 2009 <a href="#">[91]</a>      | Turkey      | Cross-sectional | Clinical | No  | 52  | 14  | 26.9% | 15.6–41.0% |
| Onal et al. 2009 <a href="#">[61]</a>           | Turkey      | Case series     | Clinical | No  | 75  | 26  | 34.7% | 24.0–46.5% |
| Patti et al. 1997 <a href="#">[20]</a>          | Italy       | Cross-sectional | Clinical | No  | 75  | 33  | 44.0% | 32.5–55.9% |
| Petersen and Pedersen 1984 <a href="#">[92]</a> | Denmark     | Cross-sectional | Clinical | Yes | 88  | 73  | 83.0% | 73.4–90.1% |
| Porru et al. 1997 <a href="#">[62]</a>          | Italy       | Cross-sectional | Clinical | No  | 120 | 52  | 43.3% | 34.3–52.7% |
| Sirls et al. 1994 <a href="#">[23]</a>          | USA         | Case series     | Clinical | No  | 113 | 79  | 69.9% | 60.6–78.2% |
| Van Poppel et al. 1983 <a href="#">[93]</a>     | Belgium     | Cross-sectional | Clinical | No  | 160 | 106 | 66.3% | 58.4–73.5% |
| Ventimiglia et al. 1998                         | Italy       | Cross-sectional | Clinical | No  | 236 | 69  | 29.2% | 23.5–35.5% |

|                                                     |             |                    |          |     |     |    |       |            |
|-----------------------------------------------------|-------------|--------------------|----------|-----|-----|----|-------|------------|
| <a href="#">[22]</a>                                |             |                    |          |     |     |    |       |            |
| Wheeler Jr. et al. 1983<br><a href="#">[94]</a>     | USA         | Cohort study       | Clinical | Yes | 18  | 10 | 55.6% | 30.8–78.5% |
|                                                     |             |                    |          |     |     |    |       |            |
| Beric and Light 1992<br><a href="#">[95]</a>        | USA         | Cohort study       | Clinical | Yes | 17  | 13 | 76.5% | 50.1–93.2% |
| Chen et al. 2009 <a href="#">[96]</a>               | China       | Case series        | Clinical | No  | 134 | 43 | 32.1% | 24.3–40.7% |
| Ehren et al. 1994 <a href="#">[97]</a>              | Sweden      | Cohort study       | Clinical | No  | 38  | 26 | 68.4% | 51.3–82.5% |
| Gupta et al. 2009 <a href="#">[4]</a>               | India       | Case series        | Clinical | No  | 52  | 43 | 82.7% | 69.7–91.8% |
| Morita et al. 1994 <a href="#">[98]</a>             | Japan       | Case series        | Clinical | No  | 76  | 52 | 68.4% | 56.7–78.6% |
| Patki et al. 2006 (a)<br><a href="#">[99]</a>       | UK          | Case series        | Clinical | No  | 10  | 6  | 60.0% | 26.2–87.8% |
| Patki et al. 2006 (b)<br><a href="#">[100]</a>      | UK          | Case series        | Clinical | No  | 64  | 25 | 39.1% | 27.1–52.1% |
| Sacomani et al. 2003                                | Brazil      | Case series        | Clinical | No  | 71  | 8  | 11.3% | 5.0–21.0%  |
| Suzuki and Ushiyama<br>2001 <a href="#">[101]</a>   | Japan       | Case-control study | Clinical | No  | 103 | 36 | 35.0% | 25.8–45.0% |
| Tosi et al. 1993 <a href="#">[102]</a>              | Italy       | Cross-sectional    | Clinical | No  | 35  | 28 | 80.0% | 63.1–91.6% |
| Van Kerrbroeck et al.<br>1993 <a href="#">[103]</a> | Netherlands | Cohort study       | Clinical | No  | 93  | 66 | 71.0% | 60.6–79.9% |

|                                                 |               |                    |               |     |     |    |        |            |
|-------------------------------------------------|---------------|--------------------|---------------|-----|-----|----|--------|------------|
| Ventimiglia et al. 1998<br><a href="#">[22]</a> | Italy         | Cross-sectional    | Clinical      | No  | 166 | 40 | 24.1%  | 17.8–31.3% |
| Watanabe et al. 1998<br><a href="#">[104]</a>   | USA and Japan | Cross-sectional    | Clinical      | No  | 44  | 8  | 18.2%  | 8.2–32.7%  |
| Weld and Dmochowski 2000 <a href="#">[44]</a>   | USA           | Case series        | Clinical      | No  | 243 | 99 | 40.7%  | 34.5–47.2% |
|                                                 |               |                    |               |     |     |    |        |            |
| Andersen and Bradley 1976 <a href="#">[83]</a>  | USA           | Cross-sectional    | Clinical      | Yes | 24  | 15 | 62.5 % | 40.6–81.2% |
| Araki et al. 2000 <a href="#">[105]</a>         | Japan         | Cross-sectional    | Clinical      | Yes | 70  | 47 | 67.1 % | 54.9–77.9% |
| Berger et al. 1987 <a href="#">[8]</a>          | USA           | Cross-sectional    | Clinical      | Yes | 29  | 26 | 89.7 % | 72.6–97.8% |
| Hattori et al. 1992<br><a href="#">[67]</a>     | Japan         | Cross-sectional    | Clinical      | No  | 39  | 19 | 48.7 % | 32.4–65.2% |
| Pavlakakis et al. 1983<br><a href="#">[32]</a>  | USA           | Cross-sectional    | Clinical      | Yes | 30  | 28 | 93.3 % | 77.9–99.2% |
| Ransmayr et al. 2008<br><a href="#">[106]</a>   | Austria       | Cross-sectional    | Clinical      | Yes | 15  | 6  | 40.0 % | 16.3–67.7% |
| Sakakibara et al. 2001<br><a href="#">[107]</a> | Japan         | Case-control study | Questionnaire | No  | 21  | 17 | 81.0 % | 58.1–94.6% |
| Stocchi et al. 1997                             | Italy         | Cross-sectional    | Clinical      | No  | 30  | 11 | 36.7   | 19.9–56.1% |

| <a href="#">[108]</a>                         |       |                 |          |     |    |    |       | %          |
|-----------------------------------------------|-------|-----------------|----------|-----|----|----|-------|------------|
| Ventimiglia et al. 1998 <a href="#">[22]</a>  | Italy | Cross-sectional | Clinical | No  | 52 | 4  | 7.7%  | 2.1–18.5%  |
|                                               |       |                 |          |     |    |    |       |            |
| Han et al. 2010 <a href="#">[109]</a>         | Korea | Case series     | Clinical | Yes | 84 | 50 | 59.5% | 48.3–70.1% |
| Khan et al. 1990 <a href="#">[110]</a>        | USA   | Case series     | Clinical | Yes | 33 | 26 | 78.8% | 61.1–91.0% |
| Kim et al. 2010 <a href="#">[111]</a>         | Korea | Case series     | Clinical | Yes | 69 | 44 | 63.8% | 51.3–75.0% |
| Motola et al. 1988 <a href="#">[79]</a>       | USA   | Cross-sectional | Clinical | No  | 30 | 13 | 43.3% | 25.5–62.6% |
| Motola and Badlani 1990 <a href="#">[112]</a> | USA   | Case series     | Clinical | No  | 44 | 20 | 45.5% | 30.4–61.2% |
| Nitti et al. 1996 <a href="#">[113]</a>       | USA   | Cross-sectional | Clinical | Yes | 38 | 31 | 81.6% | 65.7–92.3% |
| Tsuchida et al. 1983 <a href="#">[114]</a>    | Japan | Cross-sectional | Clinical | No  | 39 | 30 | 76.9% | 60.7–88.9% |

DO = detrusor overactivity; CI = confidence interval.

**Supplementary Table E.** Results of the meta-analyses of the studies reporting rates of urinary incontinence in patients with multiple sclerosis

| Study                       | No. of patients | Rate  | 95% CI      | Weights (%): random-effect meta-analysis                       |
|-----------------------------|-----------------|-------|-------------|----------------------------------------------------------------|
| Barbalias et al. 1998 [54]  | 37              | 0.411 | 0.308–0.520 | 7.13                                                           |
| Bradley et al. 1973 [19]    | 60              | 0.606 | 0.503–0.703 | 7.16                                                           |
| Forbes et al. 2006 [83]     | 686             | 0.758 | 0.729–0.786 | 7.41                                                           |
| Gallien et al. 1998 [55]    | 103             | 0.691 | 0.61–0.764  | 7.27                                                           |
| Goldstein et al. 1982 [56]  | 41              | 0.477 | 0.368–0.587 | 7.11                                                           |
| Gonor et al. 1985 [57]      | 36              | 0.563 | 0.433–0.686 | 7.01                                                           |
| Hennessey et al. 1999 [58]  | 110             | 0.576 | 0.502–0.647 | 7.29                                                           |
| Koldewijn et al. 1995 [59]  | 55              | 0.259 | 0.202–0.324 | 7.33                                                           |
| Nair et al. 2005 [60]       | 8               | 0.615 | 0.316–0.861 | 5.82                                                           |
| Onal et al. 2009 [61]       | 160             | 0.808 | 0.746–0.860 | 7.34                                                           |
| Patti et al. 1997 [20]      | 7               | 0.069 | 0.028–0.138 | 7.35                                                           |
| Pohar et al. 2007 [84]      | 96              | 0.287 | 0.239–0.338 | 7.36                                                           |
| Porru et al. 1997 [62]      | 59              | 0.492 | 0.399–0.584 | 7.2                                                            |
| Thomas et al. 1988 [63]     | 76              | 0.535 | 0.450–0.619 | 7.23                                                           |
| <b>Pooled rate (95% CI)</b> |                 |       |             | <b>0.509 (0.367–0.650)</b>                                     |
| <b>Heterogeneity</b>        |                 |       |             | <b>I<sup>2</sup> = 98.4%</b><br><b>Chi-square p &lt; 0.001</b> |

CI = confidence interval.

**Supplementary Table F.** Results of the meta-analyses of the studies reporting rates of urinary incontinence in patients with spinal cord injury

| Study                                   | No. of patients | Rate  | 95% CI      | Weights (%): random-effect meta-analysis                       |
|-----------------------------------------|-----------------|-------|-------------|----------------------------------------------------------------|
| Blanes et al. 2009 <a href="#">[25]</a> | 60              | 0.883 | 0.774–0.952 | 25.4                                                           |
| Gomes et al. 2005 <a href="#">[64]</a>  | 26              | 0.538 | 0.334–0.734 | 23.1                                                           |
| Hansen et al. 2010 <a href="#">[65]</a> | 221             | 0.430 | 0.364–0.498 | 25.7                                                           |
| Vogel et al. 2002 <a href="#">[66]</a>  | 212             | 0.245 | 0.189–0.309 | 25.8                                                           |
| <b>Pooled rate (95% CI)</b>             |                 |       |             | <b>0.523 (0.238–0.807)</b>                                     |
| <b>Heterogeneity</b>                    |                 |       |             | <b>I<sup>2</sup> = 97.8%</b><br><b>Chi-square p &lt; 0.001</b> |

CI = confidence interval.

**Supplementary Table G.** Results of the meta-analyses of the studies reporting rates of urinary incontinence in patients with Parkinson's disease

| Study                                    | No. of patients | Rate  | 95% CI      | Weights (%): random-effect meta-analysis                       |
|------------------------------------------|-----------------|-------|-------------|----------------------------------------------------------------|
| Hattori et al. 1992 <a href="#">[67]</a> | 110             | 0.282 | 0.200–0.376 | 14.5                                                           |
| Hely et al. 2005 <a href="#">[68]</a>    | 52              | 0.423 | 0.287–0.568 | 12.9                                                           |
| Hely et al. 2008 <a href="#">[69]</a>    | 30              | 0.733 | 0.541–0.877 | 11.9                                                           |
| Pohar et al. 2009 <a href="#">[70]</a>   | 261             | 0.111 | 0.076–0.156 | 15.5                                                           |
| Singer et al. 1992 <a href="#">[71]</a>  | 48              | 0.125 | 0.047–0.252 | 14.1                                                           |
| Verbaan et al. 2007 <a href="#">[72]</a> | 420             | 0.510 | 0.461–0.558 | 15.4                                                           |
| Wullner et al. 2007 <a href="#">[73]</a> | 3214            | 0.220 | 0.206–0.235 | 15.7                                                           |
| <b>Pooled rate (95% CI)</b>              |                 |       |             | <b>0.331 (0.213–0.448)</b>                                     |
| <b>Heterogeneity</b>                     |                 |       |             | <b>I<sup>2</sup> = 97.1%</b><br><b>Chi-square p &lt; 0.001</b> |

CI = confidence interval.

**Supplementary Table H.** Results of the meta-analyses of the studies reporting rates of urinary incontinence in patients with stroke

| Study                                             | No. of patients | Rate  | 95% CI      | Weights (%): random-effect meta-analysis                       |
|---------------------------------------------------|-----------------|-------|-------------|----------------------------------------------------------------|
| Addington-Hall et al. 1995 <a href="#">[74]</a>   | 237             | 0.511 | 0.445–0.576 | 7.3                                                            |
| Barer et al. 1989 <a href="#">[75]</a>            | 259             | 0.139 | 0.099–0.187 | 7.8                                                            |
| Brittain et al. 2000 <a href="#">[49]</a>         | 382             | 0.332 | 0.285–0.382 | 7.7                                                            |
| Brittain et al. 2006 <a href="#">[76]</a>         | 1342            | 0.253 | 0.23–0.277  | 8.1                                                            |
| Brocklehurst et al. 1985 <a href="#">[33]</a>     | 28              | 0.143 | 0.04–0.327  | 5.0                                                            |
| Edwards et al. 2006 <a href="#">[50]</a>          | 361             | 0.163 | 0.127–0.206 | 7.9                                                            |
| Feder et al. 1996 <a href="#">[77]</a>            | 88              | 0.159 | 0.09–0.252  | 6.8                                                            |
| Jørgensen et al. 2005 <a href="#">[51]</a>        | 213             | 0.169 | 0.121–0.226 | 7.6                                                            |
| Kolominsky-Rabas et al. 2003 <a href="#">[78]</a> | 407             | 0.319 | 0.274–0.367 | 7.7                                                            |
| Motola J et al. 1988 <a href="#">[83]</a>         | 30              | 0.500 | 0.313–0.687 | 3.9                                                            |
| Nakayama et al. 1997 <a href="#">[52]</a>         | 493             | 0.191 | 0.157–0.228 | 7.9                                                            |
| Patel et al. 2001 <a href="#">[80]</a>            | 150             | 0.098 | 0.051–0.164 | 7.5                                                            |
| Patel et al. 2007 <a href="#">[81]</a>            | 123             | 0.153 | 0.1–0.221   | 7.4                                                            |
| Van de Port et al. 2006 <a href="#">[82]</a>      | 217             | 0.281 | 0.222–0.346 | 7.4                                                            |
| <b>Pooled rate (95% CI)</b>                       |                 |       |             | <b>0.236 (0.185–0.288)</b>                                     |
| <b>Heterogeneity</b>                              |                 |       |             | <b>I<sup>2</sup> = 93.0%</b><br><b>Chi-square p &lt; 0.001</b> |

CI = confidence interval.

**Supplementary Table 1.** Results of the meta-analyses of the studies reporting rates of detrusor overactivity in patients with multiple sclerosis

| Study                        | No. of patients | Rate  | 95% CI      | Weights (%): random-effect meta-analysis |
|------------------------------|-----------------|-------|-------------|------------------------------------------|
| Andersen et al. 1976 [83]    | 52              | 0.635 | 0.49–0.764  | 3.8                                      |
| Araki et al. 2003 [21]       | 32              | 0.438 | 0.264–0.623 | 3.5                                      |
| Awad et al. 1984 [84]        | 57              | 0.667 | 0.529–0.786 | 3.9                                      |
| Barbalias et al. 1998 [54]   | 90              | 0.578 | 0.469–0.681 | 4.0                                      |
| Betts et al. (1993) [9]      | 70              | 0.900 | 0.805–0.959 | 4.2                                      |
| Bradley et al. 1978 [85]     | 99              | 0.619 | 0.562–0.674 | 4.3                                      |
| Bradley et al. 1973 [19]     | 302             | 0.596 | 0.493–0.693 | 4.1                                      |
| Gallien et al. 1998 [55]     | 149             | 0.409 | 0.33–0.493  | 4.1                                      |
| Giannantoni et al. 1999 [86] | 116             | 0.81  | 0.727–0.877 | 4.2                                      |
| Goldstein et al. 1982 [56]   | 86              | 0.756 | 0.651–0.842 | 4.1                                      |
| Gonor et al. 1985 [57]       | 64              | 0.781 | 0.66–0.875  | 4.0                                      |
| Khan et al. 2009 [87]        | 73              | 0.589 | 0.468–0.703 | 3.9                                      |
| Kim et al. 1998 [88]         | 90              | 0.511 | 0.403–0.618 | 4.0                                      |
| Koldewijn et al. 1995 [59]   | 212             | 0.34  | 0.276–0.408 | 4.2                                      |
| Lemack et al. 2007 [89]      | 108             | 0.574 | 0.475–0.669 | 4.1                                      |
| Mayo et al. 1992 [90]        | 89              | 0.775 | 0.674–0.857 | 4.1                                      |
| Nakipoglu et al. 2009 [91]   | 52              | 0.269 | 0.156–0.41  | 3.9                                      |
| Onal et al. 2009 [61]        | 75              | 0.347 | 0.24–0.465  | 4.0                                      |
| Patti et al. 1997 [20]       | 75              | 0.440 | 0.325–0.559 | 4.0                                      |

|                                              |     |       |             |                                                                |
|----------------------------------------------|-----|-------|-------------|----------------------------------------------------------------|
| Petersen et al.1984 <a href="#">[92]</a>     | 88  | 0.830 | 0.734–0.901 | 4.1                                                            |
| Porru et al. 1997 <a href="#">[62]</a>       | 120 | 0.433 | 0.343–0.527 | 4.1                                                            |
| Sirls et al. 1994 <a href="#">[23]</a>       | 113 | 0.699 | 0.606–0.782 | 4.1                                                            |
| Van Poppel et al. 1983 <a href="#">[93]</a>  | 160 | 0.663 | 0.584–0.735 | 4.2                                                            |
| Ventimiglia et al. 1998 <a href="#">[22]</a> | 236 | 0.292 | 0.235–0.355 | 4.2                                                            |
| Wheeler et al. 1983 <a href="#">[94]</a>     | 18  | 0.556 | 0.308–0.785 | 3.1                                                            |
| <b>Pooled rate (95% CI)</b>                  |     |       |             | <b>0.582 (0.505–0.659)</b>                                     |
| <b>Heterogeneity</b>                         |     |       |             | <b>I<sup>2</sup> = 94.2%</b><br><b>Chi-square p &lt; 0.001</b> |

CI = confidence interval.

**Supplementary Table J.** Results of the meta-analyses of the studies reporting rates of detrusor overactivity in patients with spinal cord injury

| Study                                           | No. of patients | Rate  | 95% CI      | Weights (%): random-effect meta-analysis                       |
|-------------------------------------------------|-----------------|-------|-------------|----------------------------------------------------------------|
| Beric et al. 1992 <a href="#">[83]</a>          | 17              | 0.765 | 0.501–0.932 | 6.3                                                            |
| Chen et al. 2009 <a href="#">[84]</a>           | 134             | 0.321 | 0.243–0.407 | 7.5                                                            |
| Ehren et al. 1994 <a href="#">[85]</a>          | 38              | 0.684 | 0.513–0.825 | 7.0                                                            |
| Gupta et al. 2009 <a href="#">[4]</a>           | 52              | 0.827 | 0.697–0.918 | 7.3                                                            |
| Morita et al. 1994 <a href="#">[86]</a>         | 76              | 0.684 | 0.567–0.786 | 7.4                                                            |
| Patki et al. 2006a) <a href="#">[87]</a>        | 10              | 0.600 | 0.262–0.878 | 5.3                                                            |
| Patki et al. 2006b <a href="#">[88]</a>         | 64              | 0.391 | 0.271–0.521 | 7.2                                                            |
| Sacomani et al. 2003 <a href="#">[89]</a>       | 71              | 0.113 | 0.050–0.210 | 7.6                                                            |
| Suzuki et al. 2001 <a href="#">[90]</a>         | 103             | 0.350 | 0.258–0.450 | 7.5                                                            |
| Tosi et al. 1993 <a href="#">[91]</a>           | 35              | 0.800 | 0.631–0.916 | 7.1                                                            |
| Van Kerrbroeck et al. 1993 <a href="#">[92]</a> | 93              | 0.710 | 0.606–0.799 | 7.4                                                            |
| Ventimiglia et al. 1998 <a href="#">[22]</a>    | 166             | 0.241 | 0.178–0.313 | 7.6                                                            |
| Watanabe et al. 1998 <a href="#">[93]</a>       | 44              | 0.182 | 0.082–0.327 | 7.2                                                            |
| Weld et al. 2000 <a href="#">[44]</a>           | 243             | 0.407 | 0.345–0.472 | 7.6                                                            |
| <b>Pooled rate (95% CI)</b>                     |                 |       |             | <b>0.497 (0.373–0.622)</b>                                     |
| <b>Heterogeneity</b>                            |                 |       |             | <b>I<sup>2</sup> = 95.1%</b><br><b>Chi-square p &lt; 0.001</b> |

CI = confidence interval.

**Supplementary Table K.** Results of the meta-analyses of the studies reporting rates of detrusor overactivity in patients with Parkinson's disease

| Study                       | No. of patients | Rate  | 95% CI      | Weights (%): random-effect meta-analysis                       |
|-----------------------------|-----------------|-------|-------------|----------------------------------------------------------------|
| Andersen et al. 1976 [83]   | 24              | 0.625 | 0.406–0.812 | 10.8                                                           |
| Araki et al. 2000 [84]      | 70              | 0.671 | 0.549–0.779 | 11.4                                                           |
| Berger et al. 1987 [8]      | 29              | 0.897 | 0.726–0.978 | 11.4                                                           |
| Hattori et al. 1992 [67]    | 39              | 0.487 | 0.324–0.652 | 11.1                                                           |
| Pavlakakis et al. 1983 [32] | 30              | 0.933 | 0.779–0.992 | 11.5                                                           |
| Ransmayr et al. 2008 [85]   | 15              | 0.400 | 0.163–0.677 | 10.4                                                           |
| Sakakibara et al. 2001[86]  | 21              | 0.810 | 0.581–0.946 | 11.0                                                           |
| Stocchi et al. 1997 [87]    | 30              | 0.367 | 0.199–0.561 | 11.0                                                           |
| Ventimiglia 1998 [22]       | 52              | 0.077 | 0.021–0.185 | 11.6                                                           |
| <b>Pooled rate (95% CI)</b> |                 |       |             | <b>0.586 (0.343–0.830)</b>                                     |
| <b>Heterogeneity</b>        |                 |       |             | <b>I<sup>2</sup> = 96.4%</b><br><b>Chi-square p &lt; 0.001</b> |

CI = confidence interval.

**Supplementary Table L.** Results of the meta-analyses of the studies reporting rates of detrusor overactivity in patients with stroke

| Study                                      | No. of patients | Rate  | 95% CI      | Weights (%): random-effect meta-analysis                       |
|--------------------------------------------|-----------------|-------|-------------|----------------------------------------------------------------|
| Han et al. 2010 <a href="#">[83]</a>       | 84              | 0.595 | 0.483–0.701 | 15.9                                                           |
| Khan et al. 1990 <a href="#">[84]</a>      | 33              | 0.788 | 0.611–0.91  | 13.9                                                           |
| Kim et al. 2010 <a href="#">[85]</a>       | 69              | 0.638 | 0.513–0.75  | 15.5                                                           |
| Motola et al. 1990 <a href="#">[86]</a>    | 30              | 0.455 | 0.304–0.612 | 13.6                                                           |
| Motola et al. 1988 <a href="#">[87]</a>    | 44              | 0.433 | 0.255–0.626 | 12.1                                                           |
| Nitti et al. 1996 <a href="#">[88]</a>     | 38              | 0.816 | 0.657–0.923 | 14.7                                                           |
| Tsuchida S et al 1983 <a href="#">[89]</a> | 39              | 0.769 | 0.607–0.889 | 14.3                                                           |
| <b>Pooled rate (95% CI)</b>                |                 |       |             | <b>0.647 (0.542–0.753)</b>                                     |
| <b>Heterogeneity</b>                       |                 |       |             | <b>I<sup>2</sup> = 75.4%</b><br><b>Chi-square p &lt; 0.001</b> |

CI = confidence interval.
